# Supplementary material for: Ultrasonic-Assisted Extraction and Natural Deep Eutectic Solvents Combination: A Green Strategy to Improve the Recovery of Phenolic Compounds from Lavandula pedunculata subsp. lusitanica (Chaytor) Franco
Source: PubMed Central journal article supplement (PMC8069433; doi:10.3390/antiox10040582), 2021-04-09

# Ultrasonic-Assisted Extraction (UAE) and NADES Combination: A green strategy to Improve the Recovery of Phenolic Compounds from *Lavandula pedunculata* subsp. *lusitanica* (Chaytor) Franco

Inês Mansinhos<sup>a,†</sup>, Sandra Gonçalves<sup>a,†</sup>, Raquel Rodríguez-Solana<sup>a,b</sup>, José Luis Ordóñez-Díaz<sup>b</sup>, José Manuel Moreno-Rojas<sup>b</sup>, Anabela Romano<sup>a\*</sup>

<sup>a</sup>MED – Mediterranean Institute for Agriculture, Environment and Development, Universidade do Algarve, Faculdade de Ciências e Tecnologia, Campus de Gambelas, 8005-139 Faro, Portugal

<sup>b</sup> Department of Food Science and Health, Andalusian Institute of Agricultural and Fisheries Research and Training (IFAPA), Avenida Menendez-Pidal, SN, 14004 Córdoba, Spain

<sup>†</sup> Equal authors

\* Correspondence: [aromano@ualg.pt](mailto:aromano@ualg.pt); Tel.: +351289800910

## Supplementary information

**Table S1.** HPLC-HRMS data of identified phenolic compounds from *Lavandula pedunculata* subsp. *lusitanica* extracts.

| Peak | Compound identity                                       | Chemical formula                                | Theoretical exact mass [M-<br>H] <sup>+</sup> (m/z) | Delta ppm<br>(error) | RT<br>(min) | MSI MI<br>level* |
|------|---------------------------------------------------------|-------------------------------------------------|-----------------------------------------------------|----------------------|-------------|------------------|
| 1    | O-Caffeoylquinic acid <sup>a</sup>                      | C <sub>16</sub> H <sub>18</sub> O <sub>9</sub>  | 353.0867                                            | 2.103                | 1.48        | 2                |
| 2    | Gallic acid <sup>b</sup>                                | C <sub>7</sub> H <sub>6</sub> O <sub>5</sub>    | 169.0131                                            | -0.638               | 1.92        | 1                |
| 3    | Vanillic acid <sup>b</sup>                              | C <sub>8</sub> H <sub>8</sub> O <sub>4</sub>    | 167.0350                                            | -2.606               | 2.37        | 2                |
| 4    | Caffeic acid hexoside <sup>a</sup>                      | C <sub>15</sub> H <sub>18</sub> O <sub>9</sub>  | 341.0867                                            | -0.007               | 2.9         | 2                |
| 5    | Caffeic acid hexoside <sup>a</sup>                      | C <sub>15</sub> H <sub>18</sub> O <sub>9</sub>  | 341.0867                                            | 0.143                | 3.5         | 2                |
| 6    | Chlorogenic acid (5-O-caffeoylquinic acid) <sup>a</sup> | C <sub>16</sub> H <sub>18</sub> O <sub>9</sub>  | 353.0867                                            | 0.543                | 3.82        | 1                |
| 7    | Fertaric acid <sup>a</sup>                              | C <sub>14</sub> H <sub>14</sub> O <sub>9</sub>  | 325.0557                                            | 0.774                | 4.23        | 2                |
| 8    | Caffeic acid <sup>a</sup>                               | C <sub>9</sub> H <sub>8</sub> O <sub>4</sub>    | 179.0338                                            | -0.604               | 4.59        | 1                |
| 9    | Feruloyl hexose <sup>a</sup>                            | C <sub>16</sub> H <sub>20</sub> O <sub>9</sub>  | 355.1028                                            | 1.187                | 6.60        | 2                |
| 10   | Ferulic acid <sup>a</sup>                               | C <sub>10</sub> H <sub>10</sub> O <sub>4</sub>  | 193.0495                                            | -0.374               | 7.59        | 1                |
| 11   | Luteolin-7-O-glucuronide <sup>d</sup>                   | C <sub>21</sub> H <sub>18</sub> O <sub>12</sub> | 461.0714                                            | 0.569                | 8.11        | 2                |
| 12   | Luteolin-7-O-glucoside <sup>d</sup>                     | C <sub>21</sub> H <sub>20</sub> O <sub>11</sub> | 447.0929                                            | 1.660                | 8.12        | 2                |
| 13   | Rosmarinic acid <sup>a</sup>                            | C <sub>18</sub> H <sub>16</sub> O <sub>8</sub>  | 359.0761                                            | 0.488                | 9.57        | 1                |
| 14   | Apigenin-7-O-glucoside <sup>d</sup>                     | C <sub>21</sub> H <sub>20</sub> O <sub>10</sub> | 431.0977                                            | 0.9594               | 9.72        | 2                |
| 15   | Salvianolic acid A isomer I <sup>a</sup>                | C <sub>26</sub> H <sub>22</sub> O <sub>10</sub> | 493.1129                                            | 0.508                | 10.11       | 2                |
| 16   | Salvianolic acid A isomer II <sup>a</sup>               | C <sub>26</sub> H <sub>22</sub> O <sub>10</sub> | 493.1129                                            | 0.358                | 10.97       | 2                |
| 17   | Salvianolic acid I <sup>a</sup>                         | C <sub>27</sub> H <sub>22</sub> O <sub>12</sub> | 537.1027                                            | 1.499                | 11.13       | 2                |
| 18   | Salvianolic acid B <sup>a</sup>                         | C <sub>36</sub> H <sub>30</sub> O <sub>16</sub> | 717.1450                                            | -0.049               | 11.23       | 2                |
| 19   | Apigenin-7-O-acetylglucoside <sup>d</sup>               | C <sub>23</sub> H <sub>22</sub> O <sub>11</sub> | 473.1082                                            | 0.808                | 11.55       | 2                |
| 20   | Herniarin <sup>c</sup>                                  | C <sub>10</sub> H <sub>8</sub> O <sub>3</sub>   | 175.0389                                            | -0.429               | 12.14       | 2                |
| 21   | Salvianolic acid A isomer III <sup>a</sup>              | C <sub>26</sub> H <sub>22</sub> O <sub>10</sub> | 493.1129                                            | -0.132               | 12.8        | 2                |
| 22   | Luteolin <sup>d</sup>                                   | C <sub>15</sub> H <sub>10</sub> O <sub>6</sub>  | 285.0393                                            | 0.277                | 13.5        | 1                |
| 23   | Naringenin <sup>e</sup>                                 | C <sub>15</sub> H <sub>12</sub> O <sub>5</sub>  | 271.0600                                            | 0.172                | 14.01       | 1                |
| 24   | Apigenin <sup>d</sup>                                   | C <sub>15</sub> H <sub>10</sub> O <sub>5</sub>  | 269.0444                                            | 0.172                | 14.8        | 1                |

\*Metabolite standards initiative metabolite identification (MSI MI) levels. Reference standards were available for all compounds identified at MSI MI level 1. Class of compounds: phenolic acids (<sup>a</sup>hydroxycinnamic acids and <sup>b</sup>hydroxybenzoic acids); <sup>c</sup>Coumarin derivative; flavonoids (<sup>d</sup>flavones and <sup>e</sup>flavanones).

**Table S2.** Summary of HPLC-HRMS parameters for quantification of phenolic compounds in *Lavandula pedunculata* subsp. *lusitanica* extracts.

| Compound                | Linear range (mg/L) | Intercept | Slope   | R <sup>2</sup> | LOD (mg/mL) | LOQ (mg/mL) |
|-------------------------|---------------------|-----------|---------|----------------|-------------|-------------|
| Rosmarinic acid         | 0.1-100             | -103410   | 1598747 | 0.9992         | 0.06        | 0.19        |
| Caffeic acid            | 0.1-10              | 1436398   | 3950274 | 0.9990         | 0.50        | 1.68        |
| Ferulic acid            | 0.2-60              | 2487      | 9717    | 0.9995         | 0.37        | 1.25        |
| Gallic acid             | 0.2-15              | -330994   | 2547719 | 0.9998         | 0.00        | 0.01        |
| Chlorogenic acid        | 0.2-15              | -243627   | 1363025 | 0.9993         | 0.00        | 0.01        |
| Luteolin                | 0.2-15              | 1464030   | 5454860 | 0.9990         | 0.29        | 0.96        |
| Apigenin                | 0.2-15              | 185082    | 6649959 | 0.9995         | 0.00        | 0.01        |
| Naringenin              | 0.2-15              | -314843   | 2143048 | 0.9996         | 0.37        | 1.23        |
| <i>p</i> -Coumaric acid | 0.2-15              | -2024     | 73034   | 0.9999         | 0.22        | 0.72        |

**Figure S1.** HPLC-HRMS extracted-ion chromatogram of phenolic compounds in *Lavandula pedunculata* subsp. *lusitanica* extracts obtained by ultrasound-assisted extraction for 60 min in combination with different NADES and conventional solvents. The compound name corresponding to each number of peaks can be consulted in Supplementary Table 1.

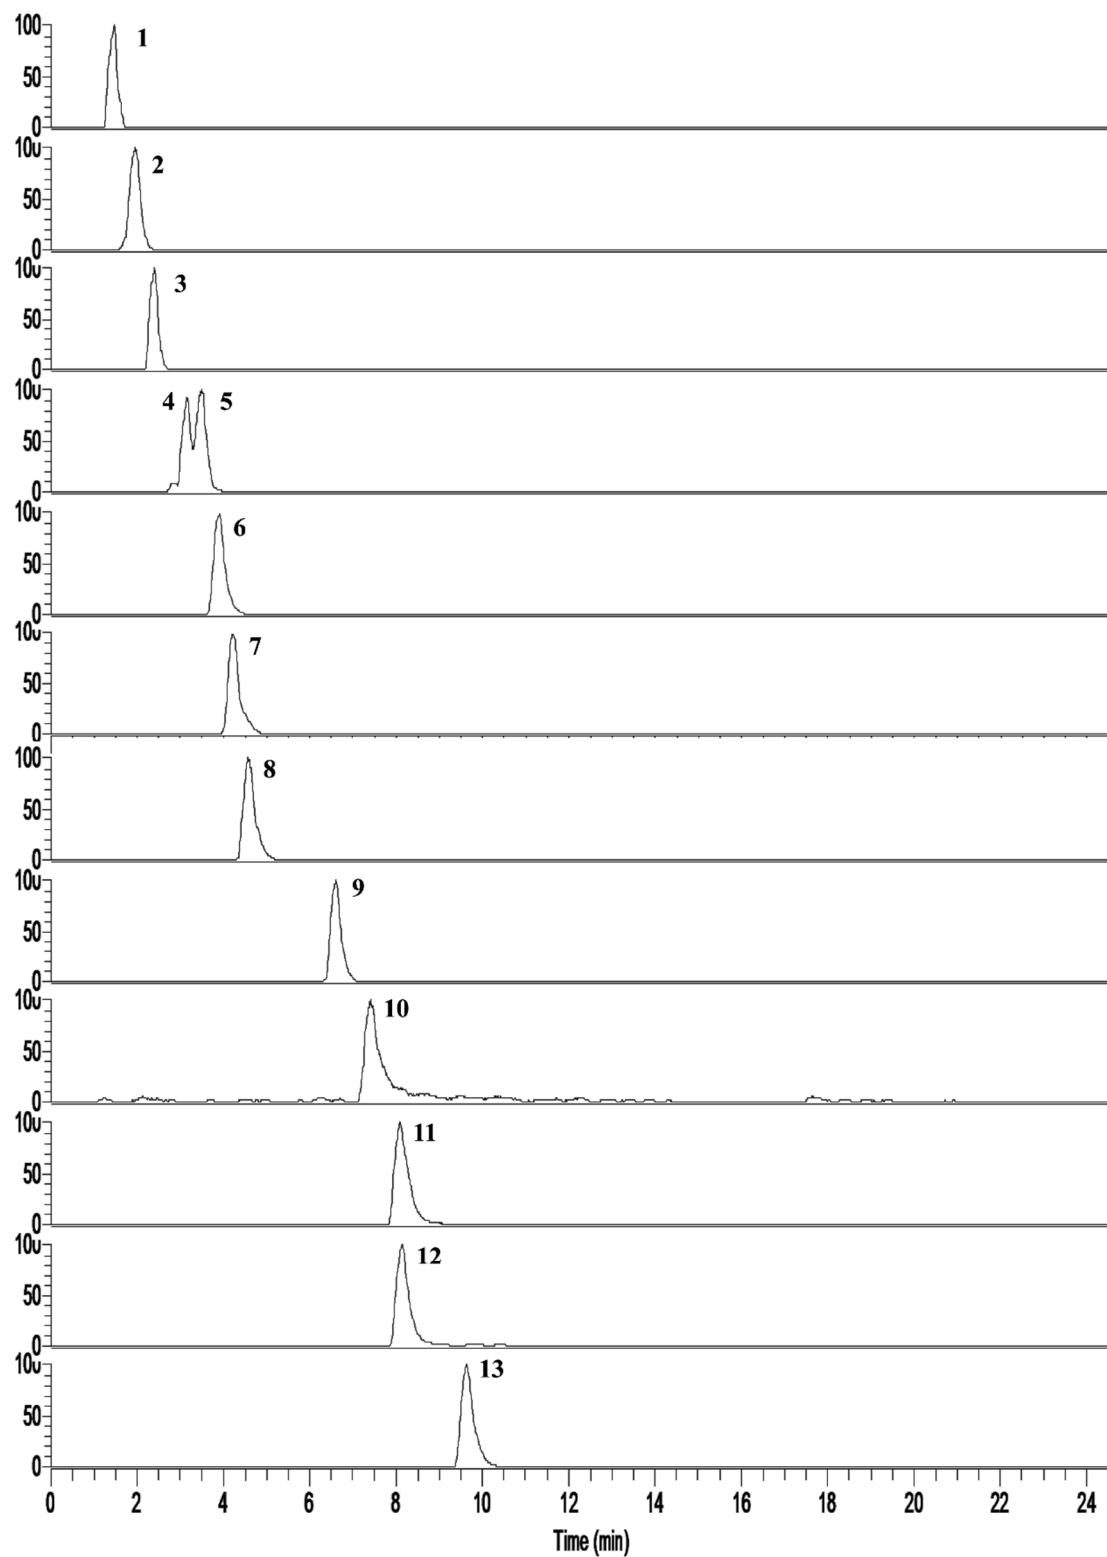

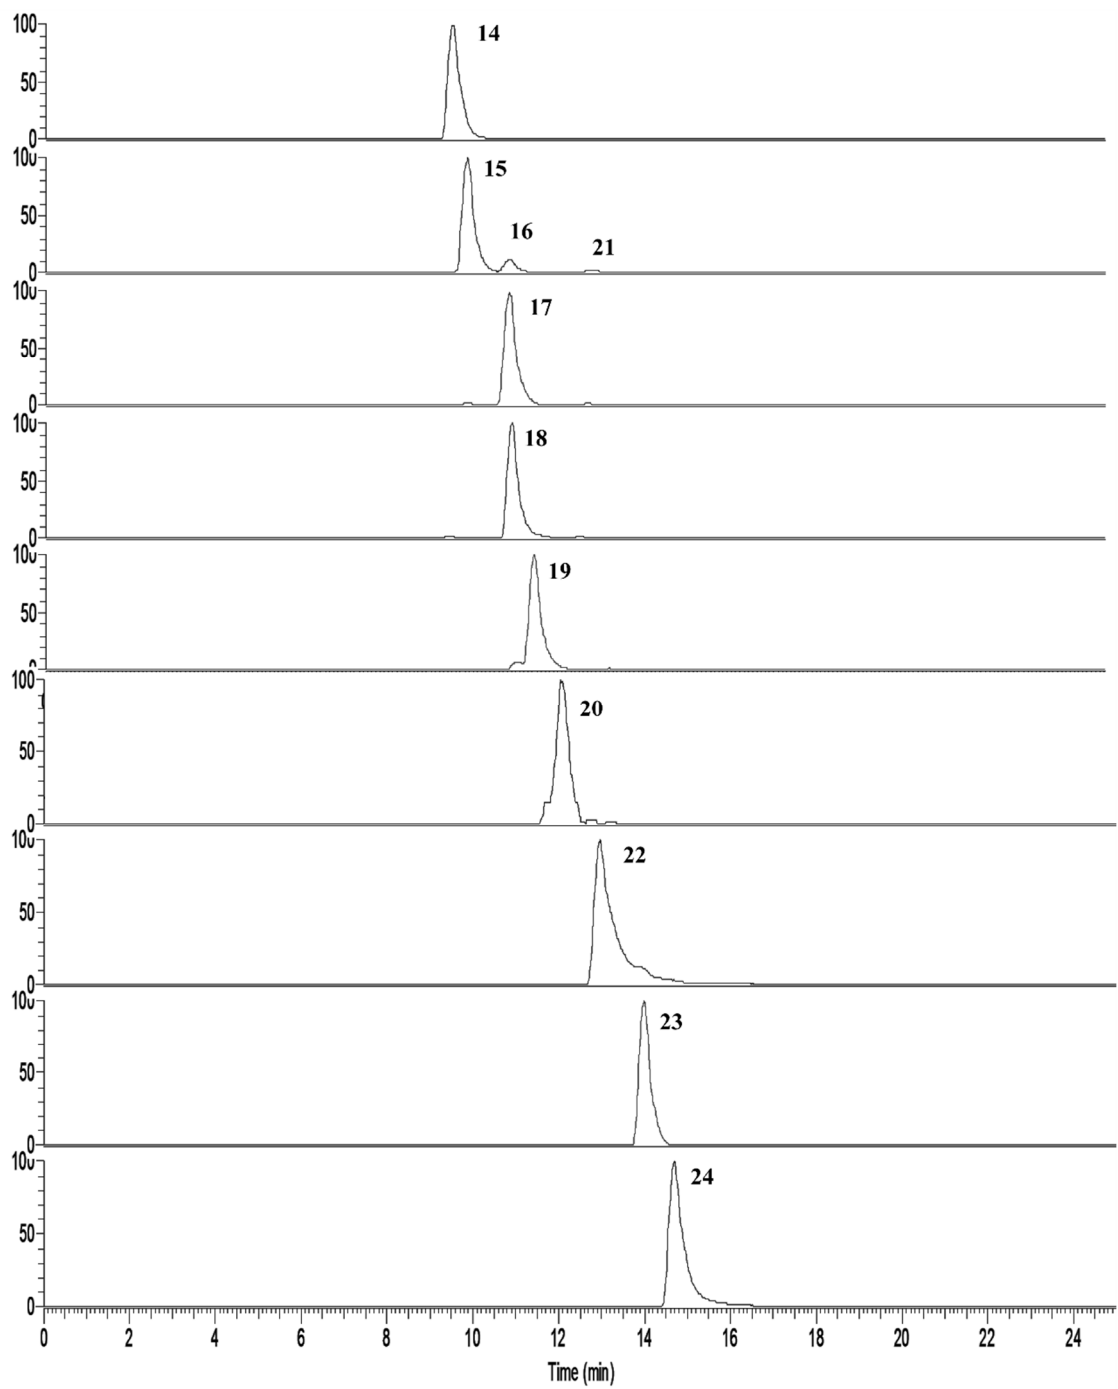

Supplement: antioxidants-10-00582-s001.pdf [file antioxidants-10-00582-s001.pdf]
